# Supplementary material for: Assessing the Fatty Acid, Carotenoid, and Tocopherol Compositions of Seeds from Apple Cultivars (Malus domestica Borkh.) Grown in Norway
Source: MDPI journal article supplement (doi:10.3390/foods10081956), 2021-08-22
Supplement: s1 [file s1]

Table S1. The oil content and fatty acid composition of apple cultivars

| Cultivar No. | Oil content (%) | Fatty acid composition of oil (%)* |       |         |                |       |       |          |                     |       |          |       |        |          |         |            |           |
|--------------|-----------------|------------------------------------|-------|---------|----------------|-------|-------|----------|---------------------|-------|----------|-------|--------|----------|---------|------------|-----------|
|              |                 | Palm                               | Pal   | Heptdec | cis-10-Heptdec | Stear | Oleic | Linoleic | $\alpha$ -Linolenic | Arach | 11-Eicos | C20   | Arachi | Heneicos | Behenic | Lignoceric | Docosahex |
| 1            | 18.51           | 5.93                               | 0.03  | 0.05    | 0.03           | 1.44  | 28.55 | 61.12    | 0.45                | 1.12  | 0.44     | 0.02  | 0.09   | 0.05     | 0.26    | 0.07       | 0.34      |
| 2            | 17.11           | 6.81                               | <0.01 | 0.05    | 0.03           | 1.53  | 31.88 | 57.18    | 0.28                | 1.15  | 0.33     | 0.08  | 0.15   | 0.05     | 0.19    | 0.07       | 0.17      |
| 3            | 15.42           | 7.47                               | 0.05  | 0.05    | 0.03           | 1.80  | 31.38 | 56.07    | 0.51                | 1.29  | 0.40     | 0.06  | 0.10   | 0.06     | 0.30    | 0.09       | 0.25      |
| 4            | 10.10           | 7.64                               | 0.06  | 0.04    | 0.07           | 1.40  | 25.42 | 62.15    | 0.87                | 1.03  | 0.48     | 0.05  | <0.01  | 0.05     | 0.27    | 0.09       | 0.37      |
| 5            | 7.73            | 6.99                               | <0.01 | <0.01   | <0.01          | 1.49  | 21.76 | 66.73    | 0.73                | 0.99  | 0.36     | 0.10  | 0.14   | 0.08     | 0.27    | 0.10       | 0.16      |
| 6            | 15.98           | 6.19                               | <0.01 | 0.06    | <0.01          | 1.41  | 30.14 | 59.01    | <0.01               | 1.17  | 0.90     | 0.05  | 0.11   | 0.06     | 0.27    | 0.11       | 0.53      |
| 7            | 17.23           | 7.04                               | 0.04  | 0.05    | 0.03           | 1.46  | 24.40 | 64.31    | 0.50                | 0.98  | 0.33     | 0.08  | 0.19   | 0.04     | 0.25    | 0.08       | 0.20      |
| 8            | 12.65           | 5.75                               | <0.01 | 0.07    | 0.06           | 1.90  | 30.49 | 58.34    | 0.51                | 1.48  | 0.55     | 0.06  | 0.12   | 0.08     | 0.33    | 0.10       | 0.17      |
| 9            | 19.95           | 5.68                               | <0.01 | 0.14    | 0.10           | 1.50  | 28.91 | 61.14    | 0.26                | 1.08  | 0.31     | 0.06  | 0.11   | 0.04     | 0.25    | 0.10       | 0.37      |
| 10           | 14.54           | 7.65                               | 0.06  | 0.05    | 0.04           | 1.66  | 27.61 | 60.20    | 0.49                | 1.09  | 0.35     | 0.07  | 0.12   | 0.07     | 0.20    | 0.10       | 0.24      |
| 11           | 17.89           | 6.07                               | 0.03  | 0.04    | 0.02           | 1.59  | 29.42 | 60.57    | 0.28                | 1.14  | 0.32     | 0.04  | <0.01  | 0.03     | 0.23    | 0.07       | 0.14      |
| 12           | 16.27           | 6.09                               | 0.17  | 0.03    | 0.03           | 1.60  | 27.20 | 62.03    | 0.32                | 1.35  | 0.35     | 0.05  | 0.13   | 0.04     | 0.26    | 0.08       | 0.26      |
| 13           | 14.18           | 7.15                               | 0.05  | 0.06    | 0.02           | 1.33  | 25.17 | 63.19    | 0.57                | 1.12  | 0.44     | 0.08  | 0.13   | 0.04     | 0.36    | 0.13       | 0.15      |
| 14           | 19.92           | 6.82                               | 0.04  | 0.05    | 0.05           | 1.50  | 32.90 | 55.66    | 0.57                | 1.17  | 0.51     | 0.08  | <0.01  | 0.04     | 0.22    | 0.16       | 0.24      |
| 15           | 17.06           | 6.25                               | 0.10  | 0.16    | <0.01          | 1.77  | 35.10 | 54.20    | 0.20                | 1.21  | 0.27     | <0.01 | 0.13   | <0.01    | 0.27    | 0.09       | 0.24      |
| 16           | 16.30           | 7.13                               | 0.06  | 0.07    | 0.05           | 1.83  | 28.14 | 59.67    | 0.63                | 1.28  | 0.36     | 0.05  | 0.13   | 0.02     | 0.31    | 0.10       | 0.17      |
| 17           | 14.47           | 7.11                               | 0.05  | 0.07    | 0.05           | 1.69  | 34.82 | 53.20    | 0.36                | 1.36  | 0.58     | <0.01 | 0.13   | 0.05     | 0.30    | 0.09       | 0.12      |
| 18           | 14.31           | 8.47                               | 0.07  | 0.06    | 0.03           | 1.41  | 27.22 | 59.79    | 0.57                | 1.05  | 0.39     | 0.06  | 0.11   | 0.05     | 0.22    | 0.13       | 0.36      |

|    |       |      |       |       |       |      |       |       |      |      |      |      |       |       |      |       |       |
|----|-------|------|-------|-------|-------|------|-------|-------|------|------|------|------|-------|-------|------|-------|-------|
| 19 | 11.58 | 7.61 | 0.06  | 0.05  | 0.04  | 1.69 | 29.59 | 57.85 | 0.45 | 1.23 | 0.40 | 0.08 | 0.12  | 0.07  | 0.28 | 0.09  | 0.40  |
| 20 | 17.93 | 6.39 | <0.01 | 0.07  | 0.03  | 1.53 | 29.57 | 59.51 | 0.45 | 1.13 | 0.44 | 0.05 | 0.12  | 0.05  | 0.27 | 0.02  | 0.30  |
| 21 | 18.13 | 7.08 | 0.06  | 0.10  | 0.05  | 1.68 | 28.17 | 59.74 | 0.45 | 1.20 | 0.39 | 0.06 | 0.09  | 0.08  | 0.28 | 0.09  | 0.48  |
| 22 | 14.45 | 7.52 | 0.05  | 0.07  | 0.04  | 1.53 | 31.63 | 55.88 | 0.53 | 1.19 | 0.42 | 0.04 | 0.17  | 0.07  | 0.25 | 0.07  | 0.52  |
| 23 | 9.69  | 7.68 | 0.09  | 0.04  | 0.05  | 1.43 | 31.57 | 55.71 | 0.57 | 1.20 | 0.44 | 0.06 | 0.11  | 0.10  | 0.26 | 0.10  | 0.60  |
| 24 | 16.73 | 5.90 | <0.01 | 0.03  | 0.03  | 1.42 | 28.57 | 61.57 | 0.32 | 1.13 | 0.33 | 0.05 | 0.09  | 0.03  | 0.23 | 0.04  | 0.25  |
| 25 | 19.63 | 5.90 | 0.02  | 0.04  | 0.02  | 1.57 | 31.66 | 57.92 | 0.38 | 1.23 | 0.47 | 0.05 | 0.09  | 0.04  | 0.24 | 0.16  | 0.27  |
| 26 | 15.69 | 6.75 | <0.01 | 0.05  | 0.04  | 1.53 | 25.72 | 62.83 | 0.53 | 1.16 | 0.43 | 0.07 | 0.12  | 0.06  | 0.26 | <0.01 | 0.35  |
| 27 | 19.98 | 6.35 | 0.06  | 0.06  | <0.01 | 1.66 | 32.59 | 55.72 | 0.40 | 1.47 | 0.59 | 0.07 | 0.21  | 0.07  | 0.32 | 0.11  | 0.33  |
| 28 | 22.10 | 6.28 | 0.03  | 0.11  | 0.02  | 1.50 | 29.69 | 60.09 | 0.23 | 1.13 | 0.33 | 0.06 | 0.07  | 0.04  | 0.23 | 0.07  | 0.11  |
| 29 | 15.34 | 6.38 | <0.01 | 0.09  | 0.07  | 1.45 | 26.54 | 62.36 | 0.49 | 1.18 | 0.50 | 0.05 | 0.12  | 0.05  | 0.26 | 0.08  | 0.38  |
| 30 | 12.24 | 7.43 | 0.10  | 0.05  | <0.01 | 1.27 | 24.82 | 63.26 | 0.56 | 1.16 | 0.52 | 0.09 | 0.10  | 0.07  | 0.32 | 0.10  | 0.16  |
| 31 | 15.89 | 6.46 | 0.07  | 0.05  | 0.03  | 1.80 | 35.22 | 53.15 | 0.52 | 1.37 | 0.48 | 0.05 | 0.10  | 0.04  | 0.32 | 0.15  | 0.18  |
| 32 | 9.96  | 8.55 | 0.07  | 0.05  | 0.03  | 1.39 | 24.08 | 62.45 | 0.77 | 1.05 | 0.41 | 0.08 | 0.17  | 0.07  | 0.25 | 0.09  | 0.49  |
| 33 | 21.21 | 6.21 | <0.01 | 0.07  | <0.01 | 1.76 | 26.91 | 62.48 | 0.22 | 1.10 | 0.57 | 0.06 | 0.07  | <0.01 | 0.28 | 0.09  | 0.21  |
| 34 | 15.96 | 6.56 | 0.04  | 0.07  | 0.06  | 1.62 | 32.87 | 55.26 | 0.52 | 1.29 | 0.45 | 0.04 | 0.15  | 0.05  | 0.28 | 0.10  | 0.64  |
| 35 | 13.70 | 7.04 | 0.05  | 0.04  | 0.06  | 1.44 | 26.44 | 61.88 | 0.59 | 1.15 | 0.45 | 0.09 | 0.11  | 0.05  | 0.30 | 0.15  | 0.15  |
| 36 | 9.71  | 8.11 | 0.11  | 0.08  | 0.04  | 1.56 | 25.52 | 62.32 | 0.44 | 0.96 | 0.46 | 0.07 | <0.01 | 0.05  | 0.24 | 0.09  | <0.01 |
| 37 | 15.42 | 6.62 | 0.03  | 0.07  | 0.03  | 1.52 | 27.31 | 61.54 | 0.53 | 1.17 | 0.46 | 0.06 | <0.01 | 0.09  | 0.24 | 0.08  | 0.26  |
| 38 | 19.62 | 6.11 | 0.03  | 0.05  | 0.04  | 1.48 | 31.27 | 58.29 | 0.26 | 1.27 | 0.36 | 0.04 | 0.09  | 0.05  | 0.26 | 0.10  | 0.30  |
| 39 | 17.64 | 6.31 | 0.11  | 0.06  | <0.01 | 1.78 | 32.76 | 56.16 | 0.47 | 1.23 | 0.42 | 0.05 | 0.10  | 0.05  | 0.30 | 0.09  | 0.10  |
| 40 | 16.56 | 6.85 | <0.01 | 0.09  | 0.07  | 1.67 | 30.04 | 58.20 | 0.32 | 1.25 | 0.37 | 0.04 | 0.10  | 0.37  | 0.31 | 0.14  | 0.24  |
| 41 | 15.31 | 6.79 | <0.01 | <0.01 | <0.01 | 1.28 | 24.56 | 64.53 | 0.52 | 1.09 | 0.46 | 0.11 | 0.08  | 0.07  | 0.30 | 0.08  | 0.15  |

|    |       |      |       |       |       |      |       |       |      |      |      |      |       |       |      |      |      |
|----|-------|------|-------|-------|-------|------|-------|-------|------|------|------|------|-------|-------|------|------|------|
| 42 | 8.50  | 8.27 | 0.10  | 0.07  | 0.05  | 1.75 | 28.72 | 57.79 | 0.86 | 1.13 | 0.33 | 0.07 | 0.09  | 0.05  | 0.30 | 0.09 | 0.27 |
| 43 | 12.84 | 7.40 | 0.05  | 0.06  | 0.04  | 1.49 | 22.97 | 65.13 | 0.69 | 1.03 | 0.35 | 0.12 | 0.14  | <0.01 | 0.27 | 0.11 | 0.17 |
| 44 | 18.96 | 7.10 | 0.04  | 0.06  | 0.03  | 1.58 | 34.93 | 52.66 | 0.44 | 1.32 | 0.57 | 0.04 | 0.11  | 0.04  | 0.32 | 0.11 | 0.64 |
| 45 | 14.73 | 9.73 | 0.08  | 0.08  | 0.05  | 2.22 | 34.77 | 50.04 | 0.43 | 1.30 | 0.40 | 0.04 | 0.10  | 0.05  | 0.26 | 0.12 | 0.32 |
| 46 | 17.74 | 6.20 | <0.01 | <0.01 | <0.01 | 1.72 | 32.94 | 56.56 | 0.20 | 1.29 | 0.38 | 0.06 | 0.10  | 0.03  | 0.22 | 0.10 | 0.20 |
| 47 | 9.69  | 7.84 | <0.01 | 0.04  | 0.06  | 1.39 | 27.13 | 60.64 | 0.54 | 1.12 | 0.54 | 0.07 | 0.11  | 0.05  | 0.23 | 0.11 | 0.11 |
| 48 | 15.05 | 7.49 | 0.07  | 0.05  | 0.03  | 1.84 | 28.25 | 59.48 | 0.48 | 1.14 | 0.37 | 0.05 | 0.11  | 0.07  | 0.29 | 0.09 | 0.18 |
| 49 | 19.49 | 6.12 | <0.01 | 0.09  | <0.01 | 1.58 | 30.54 | 58.89 | 0.42 | 1.20 | 0.43 | 0.07 | 0.12  | 0.06  | 0.28 | 0.09 | 0.08 |
| 50 | 12.67 | 6.66 | 0.05  | 0.04  | 0.03  | 1.66 | 27.85 | 60.21 | 0.57 | 1.28 | 0.50 | 0.09 | <0.01 | 0.11  | 0.29 | 0.09 | 0.56 |
| 51 | 13.52 | 6.87 | 0.06  | 0.05  | 0.03  | 1.34 | 29.21 | 59.28 | 0.44 | 1.36 | 0.58 | 0.07 | 0.10  | 0.05  | 0.29 | 0.12 | 0.15 |
| 52 | 8.67  | 8.09 | 0.05  | 0.06  | 0.04  | 1.83 | 33.35 | 52.95 | 0.54 | 1.42 | 0.49 | 0.08 | 0.15  | 0.06  | 0.34 | 0.13 | 0.43 |
| 53 | 20.94 | 6.25 | 0.03  | 0.03  | 0.03  | 1.79 | 27.47 | 61.08 | 0.52 | 1.28 | 0.45 | 0.05 | 0.13  | 0.03  | 0.30 | 0.10 | 0.46 |
| 54 | 18.83 | 6.47 | 0.08  | 0.11  | <0.01 | 1.76 | 24.50 | 64.39 | 0.46 | 1.05 | 0.37 | 0.07 | <0.01 | 0.04  | 0.22 | 0.17 | 0.31 |
| 55 | 15.43 | 6.44 | 0.04  | 0.04  | 0.04  | 1.50 | 29.61 | 59.58 | 0.42 | 1.13 | 0.46 | 0.05 | 0.09  | 0.05  | 0.22 | 0.07 | 0.25 |
| 56 | 18.26 | 8.90 | 0.11  | 0.05  | 0.04  | 1.71 | 31.32 | 54.05 | 0.32 | 1.42 | 0.54 | 0.06 | 0.13  | 0.07  | 0.38 | 0.15 | 0.74 |
| 57 | 16.34 | 7.27 | 0.04  | 0.05  | 0.02  | 1.28 | 25.78 | 62.65 | 0.53 | 1.11 | 0.47 | 0.09 | 0.10  | 0.04  | 0.26 | 0.08 | 0.22 |
| 58 | 15.20 | 7.16 | 0.04  | 0.05  | 0.03  | 1.51 | 29.12 | 58.70 | 0.53 | 1.31 | 0.50 | 0.06 | 0.15  | 0.07  | 0.36 | 0.11 | 0.30 |
| 59 | 19.75 | 6.71 | 0.04  | 0.07  | 0.03  | 1.45 | 30.67 | 58.69 | 0.28 | 1.07 | 0.33 | 0.05 | 0.11  | 0.07  | 0.26 | 0.08 | 0.16 |
| 60 | 17.75 | 6.22 | <0.01 | 0.07  | 0.03  | 1.71 | 32.91 | 56.59 | 0.23 | 1.29 | 0.38 | 0.07 | 0.08  | 0.03  | 0.22 | 0.08 | 0.09 |
| 61 | 19.69 | 6.90 | 0.03  | 0.09  | 0.04  | 1.56 | 27.75 | 60.38 | 0.48 | 1.31 | 0.45 | 0.07 | 0.11  | 0.04  | 0.32 | 0.11 | 0.33 |
| 62 | 18.87 | 6.29 | 0.06  | 0.05  | 0.09  | 1.64 | 30.36 | 58.62 | 0.46 | 1.21 | 0.46 | 0.05 | 0.13  | 0.05  | 0.25 | 0.08 | 0.27 |
| 63 | 11.37 | 7.41 | 0.06  | 0.09  | 0.05  | 1.71 | 27.95 | 59.77 | 0.49 | 1.17 | 0.38 | 0.06 | 0.11  | 0.06  | 0.33 | 0.10 | 0.18 |
| 64 | 20.85 | 6.43 | 0.03  | 0.05  | 0.11  | 1.49 | 27.28 | 61.94 | 0.44 | 1.14 | 0.43 | 0.03 | 0.09  | 0.09  | 0.28 | 0.08 | 0.15 |

|    |       |      |       |       |       |      |       |       |      |      |      |       |       |      |      |       |      |
|----|-------|------|-------|-------|-------|------|-------|-------|------|------|------|-------|-------|------|------|-------|------|
| 65 | 20.22 | 6.37 | 0.05  | 0.06  | 0.03  | 1.59 | 33.21 | 55.73 | 0.34 | 1.21 | 0.37 | 0.11  | 0.15  | 0.03 | 0.28 | 0.12  | 0.36 |
| 66 | 18.71 | 6.61 | 0.05  | 0.03  | 0.03  | 1.41 | 24.78 | 63.93 | 0.53 | 1.15 | 0.48 | 0.08  | 0.10  | 0.07 | 0.28 | 0.10  | 0.36 |
| 67 | 14.57 | 7.06 | 0.06  | 0.04  | 0.02  | 1.71 | 27.57 | 60.45 | 0.50 | 1.15 | 0.31 | 0.05  | 0.15  | 0.06 | 0.22 | 0.12  | 0.51 |
| 68 | 17.18 | 7.04 | <0.01 | 0.08  | 0.07  | 1.53 | 28.37 | 60.37 | 0.26 | 1.16 | 0.34 | 0.05  | <0.01 | 0.06 | 0.23 | <0.01 | 0.44 |
| 69 | 17.78 | 5.71 | 0.07  | 0.10  | <0.01 | 1.59 | 32.16 | 57.78 | 0.21 | 1.34 | 0.36 | 0.25  | 0.09  | 0.08 | 0.25 | 0.06  | 0.25 |
| 70 | 17.59 | 6.08 | 0.03  | 0.03  | 0.04  | 1.69 | 30.09 | 59.52 | 0.28 | 1.19 | 0.34 | 0.04  | <0.01 | 0.04 | 0.29 | 0.12  | 0.22 |
| 71 | 17.94 | 6.16 | 0.05  | 0.06  | 0.04  | 1.61 | 26.39 | 62.84 | 0.47 | 1.11 | 0.42 | 0.07  | <0.01 | 0.12 | 0.26 | 0.10  | 0.31 |
| 72 | 20.88 | 5.92 | <0.01 | <0.01 | <0.01 | 1.84 | 28.91 | 60.35 | 0.37 | 1.26 | 0.42 | 0.10  | 0.27  | 0.07 | 0.30 | 0.09  | 0.20 |
| 73 | 18.27 | 5.85 | <0.01 | 0.06  | <0.01 | 1.65 | 28.92 | 60.54 | 0.41 | 1.33 | 0.48 | <0.01 | 0.10  | 0.06 | 0.33 | <0.01 | 0.13 |
| 74 | 12.58 | 7.20 | 0.07  | 0.05  | 0.04  | 1.56 | 27.77 | 60.42 | 0.51 | 1.13 | 0.40 | 0.06  | 0.12  | 0.08 | 0.28 | 0.12  | 0.19 |
| 75 | 15.66 | 7.11 | 0.06  | 0.05  | 0.03  | 1.49 | 29.54 | 58.18 | 0.60 | 1.31 | 0.56 | 0.08  | 0.12  | 0.07 | 0.40 | 0.21  | 0.20 |

\*Abbreviations correspond to **Palm** (Palmitic acid (C16:0)), **Pal** (Palmitoleic acid (C16:1(n-7))), **Heptdec** (Heptadecanoic acid (C17:0)), **cis-10-Heptdec** (cis-10-Heptadecanoic acid (C17:1)), **Stear** (Stearic acid (C18:0)), **Oleic** (Oleic acid), **Linoleic** (Linoleic acid (C18:2 cis 9,12) n-6),  **$\alpha$ -Linoleic** ( $\alpha$ -Linolenic acid (C18:3 cis 9,12,15) n-3), **Arach** (Arachidic acid (C20:0)), **11-Eicos** (11-Eicosenoic acid (20:1 cis-11) n-9), **C20**, (Eicosadienoic acid (C20 :2 cis11,14) n-6), **Arachi** (Arachidonic acid (C20:4 cis-5,8,11,14) n-6), **Heneicos** (Heneicosanoic acid (C21:0)), **Behenic** (Behenic acid (C22:0)), **Lignoceric** (Lignoceric acid (C24:0)), **Docosahex** (Docosahexaenoic acid (C22:6 cis 4,7,10,13,16,19) n-3),
