# Supplementary material for: Assessing the Fatty Acid, Carotenoid, and Tocopherol Compositions of Seeds from Apple Cultivars (Malus domestica Borkh.) Grown in Norway
Source: MDPI journal article supplement (doi:10.3390/foods10081956), 2021-08-22
Supplement: s1 [file s1]

Table S2. Composition of saturated fatty acids (SFA), monounsaturated fatty acids (MUFA), polyunsaturated fatty acids (PUFA), Omega-3 fatty acids (Omega 3), Omega-6 fatty acids (Omega 6), Omega-9 fatty acids (Omega 9)

| Cultivar No. | Composition of oil (%) |       |       |         |         |         |
|--------------|------------------------|-------|-------|---------|---------|---------|
|              | SFA                    | MUFA  | PUFA  | Omega-3 | Omega-6 | Omega-9 |
| 1            | 8.92                   | 29.06 | 62.02 | 0.79    | 61.23   | 28.99   |
| 2            | 9.85                   | 32.24 | 57.86 | 0.45    | 57.41   | 32.21   |
| 3            | 11.06                  | 31.86 | 57.00 | 0.77    | 56.23   | 31.77   |
| 4            | 10.53                  | 26.03 | 63.45 | 1.24    | 62.20   | 25.90   |
| 5            | 9.90                   | 22.12 | 67.87 | 0.90    | 66.98   | 22.12   |
| 6            | 9.27                   | 31.04 | 59.70 | 0.53    | 59.17   | 31.04   |
| 7            | 9.91                   | 24.81 | 65.28 | 0.70    | 64.58   | 24.74   |
| 8            | 9.72                   | 31.09 | 59.19 | 0.68    | 58.51   | 31.03   |
| 9            | 8.78                   | 29.32 | 61.93 | 0.63    | 61.30   | 29.22   |
| 10           | 10.82                  | 28.05 | 61.13 | 0.73    | 60.40   | 27.96   |
| 11           | 9.18                   | 29.79 | 61.04 | 0.43    | 60.61   | 29.73   |
| 12           | 9.45                   | 27.76 | 62.79 | 0.58    | 62.21   | 27.55   |
| 13           | 10.19                  | 25.68 | 64.12 | 0.72    | 63.40   | 25.61   |
| 14           | 9.96                   | 33.50 | 56.55 | 0.81    | 55.73   | 33.40   |
| 15           | 9.77                   | 35.48 | 54.77 | 0.44    | 54.33   | 35.37   |
| 16           | 10.74                  | 28.61 | 60.64 | 0.80    | 59.84   | 28.51   |
| 17           | 10.68                  | 35.51 | 53.81 | 0.48    | 53.33   | 35.41   |
| 18           | 11.39                  | 27.72 | 60.88 | 0.93    | 59.96   | 27.61   |
| 19           | 11.01                  | 30.09 | 58.90 | 0.85    | 58.05   | 30.00   |
| 20           | 9.46                   | 30.04 | 60.43 | 0.75    | 59.68   | 30.01   |

|    |       |       |       |      |       |       |
|----|-------|-------|-------|------|-------|-------|
| 21 | 10.50 | 28.67 | 60.83 | 0.93 | 59.90 | 28.56 |
| 22 | 10.71 | 32.14 | 57.15 | 1.06 | 56.09 | 32.05 |
| 23 | 10.79 | 32.15 | 57.05 | 1.18 | 55.88 | 32.01 |
| 24 | 8.78  | 28.93 | 62.29 | 0.57 | 61.72 | 28.90 |
| 25 | 9.16  | 32.17 | 58.70 | 0.65 | 58.06 | 32.12 |
| 26 | 9.81  | 26.20 | 63.90 | 0.89 | 63.01 | 26.16 |
| 27 | 10.03 | 33.23 | 56.74 | 0.74 | 56.00 | 33.17 |
| 28 | 9.37  | 30.06 | 60.57 | 0.34 | 60.23 | 30.01 |
| 29 | 9.49  | 27.11 | 63.40 | 0.87 | 62.53 | 27.04 |
| 30 | 10.40 | 25.44 | 64.16 | 0.71 | 63.45 | 25.34 |
| 31 | 10.19 | 35.80 | 54.00 | 0.71 | 53.30 | 35.70 |
| 32 | 11.45 | 24.58 | 63.97 | 1.26 | 62.70 | 24.49 |
| 33 | 9.50  | 27.48 | 63.05 | 0.44 | 62.61 | 27.48 |
| 34 | 9.97  | 33.42 | 56.61 | 1.16 | 55.45 | 33.32 |
| 35 | 10.18 | 27.00 | 62.82 | 0.74 | 62.09 | 26.89 |
| 36 | 11.08 | 26.12 | 62.82 | 0.44 | 62.39 | 25.98 |
| 37 | 9.79  | 27.82 | 62.39 | 0.79 | 61.60 | 27.76 |
| 38 | 9.33  | 31.71 | 58.98 | 0.56 | 58.42 | 31.63 |
| 39 | 9.83  | 33.30 | 56.87 | 0.57 | 56.30 | 33.18 |
| 40 | 10.68 | 30.48 | 58.90 | 0.56 | 58.34 | 30.41 |
| 41 | 9.60  | 25.02 | 65.38 | 0.67 | 64.71 | 25.02 |
| 42 | 11.65 | 29.20 | 59.09 | 1.14 | 57.95 | 29.04 |
| 43 | 10.35 | 23.40 | 66.24 | 0.86 | 65.39 | 23.31 |
| 44 | 10.54 | 35.57 | 53.89 | 1.09 | 52.80 | 35.50 |
| 45 | 13.76 | 35.31 | 50.94 | 0.75 | 50.19 | 35.18 |
| 46 | 9.56  | 33.33 | 57.11 | 0.40 | 56.71 | 33.33 |

|    |       |       |       |      |       |       |
|----|-------|-------|-------|------|-------|-------|
| 47 | 10.79 | 27.73 | 61.47 | 0.65 | 60.82 | 27.67 |
| 48 | 10.97 | 28.73 | 60.30 | 0.66 | 59.64 | 28.62 |
| 49 | 9.42  | 30.96 | 59.57 | 0.50 | 59.07 | 30.96 |
| 50 | 10.14 | 28.43 | 61.43 | 1.13 | 60.29 | 28.35 |
| 51 | 10.08 | 29.88 | 60.04 | 0.59 | 59.45 | 29.79 |
| 52 | 11.93 | 33.93 | 54.14 | 0.97 | 53.17 | 33.85 |
| 53 | 9.79  | 27.97 | 62.24 | 0.98 | 61.27 | 27.92 |
| 54 | 9.83  | 24.95 | 65.22 | 0.77 | 64.46 | 24.87 |
| 55 | 9.45  | 30.15 | 60.40 | 0.67 | 59.73 | 30.07 |
| 56 | 12.68 | 32.01 | 55.31 | 1.06 | 54.24 | 31.86 |
| 57 | 10.08 | 26.32 | 63.59 | 0.76 | 62.84 | 26.25 |
| 58 | 10.58 | 29.69 | 59.73 | 0.83 | 58.90 | 29.62 |
| 59 | 9.70  | 31.08 | 59.29 | 0.44 | 58.85 | 31.00 |
| 60 | 9.62  | 33.32 | 57.06 | 0.32 | 56.74 | 33.29 |
| 61 | 10.35 | 28.28 | 61.38 | 0.81 | 60.56 | 28.20 |
| 62 | 9.57  | 30.97 | 59.53 | 0.73 | 58.80 | 30.82 |
| 63 | 10.86 | 28.44 | 60.60 | 0.67 | 59.94 | 28.33 |
| 64 | 9.55  | 27.85 | 62.66 | 0.59 | 62.07 | 27.71 |
| 65 | 9.66  | 33.65 | 56.69 | 0.70 | 55.99 | 33.58 |
| 66 | 9.66  | 25.33 | 65.00 | 0.89 | 64.11 | 25.26 |
| 67 | 10.36 | 27.96 | 61.68 | 1.02 | 60.66 | 27.88 |
| 68 | 10.10 | 28.79 | 61.11 | 0.70 | 60.42 | 28.72 |
| 69 | 9.12  | 32.59 | 58.58 | 0.46 | 58.12 | 32.52 |
| 70 | 9.43  | 30.50 | 60.06 | 0.50 | 59.57 | 30.43 |
| 71 | 9.42  | 26.89 | 63.69 | 0.78 | 62.91 | 26.81 |
| 72 | 9.47  | 29.33 | 61.28 | 0.57 | 60.71 | 29.33 |

|    |       |       |       |      |       |       |
|----|-------|-------|-------|------|-------|-------|
| 73 | 9.28  | 29.40 | 61.18 | 0.54 | 60.64 | 29.40 |
| 74 | 10.42 | 28.28 | 61.30 | 0.70 | 60.60 | 28.17 |
| 75 | 10.64 | 30.19 | 59.17 | 0.79 | 58.37 | 30.10 |
